# Supplementary material for: Soil water content drives spatiotemporal patterns of CO 2 and N 2 O emissions from a Mediterranean riparian forest soil
Source: Copernicus journal article supplement (doi:10.5194/bg-14-4195-2017), 2017-09-21

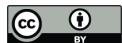

*Supplement of*

**Soil water content drives spatiotemporal patterns of CO<sub>2</sub> and N<sub>2</sub>O emissions from a Mediterranean riparian forest soil**

**Sílvia Poblador et al.**

*Correspondence to:* Sílvia Poblador ([spoblador@ub.edu](mailto:spoblador@ub.edu))

The copyright of individual parts of the supplement might differ from the CC BY 3.0 License.

Supplementary material

**Figure S1:** Concentrations of carbon dioxide (left column) and nitrous oxide (right column) during the incubation time for the sampling campaign of June 2013. Data is shown for the near-stream, intermediate and hillslope zones separately. For each plot, data is shown as mean  $\pm$  SD (n = 5) for all sampling days of June. The best fit linear model used to calculate gas emissions is shown for each plot.

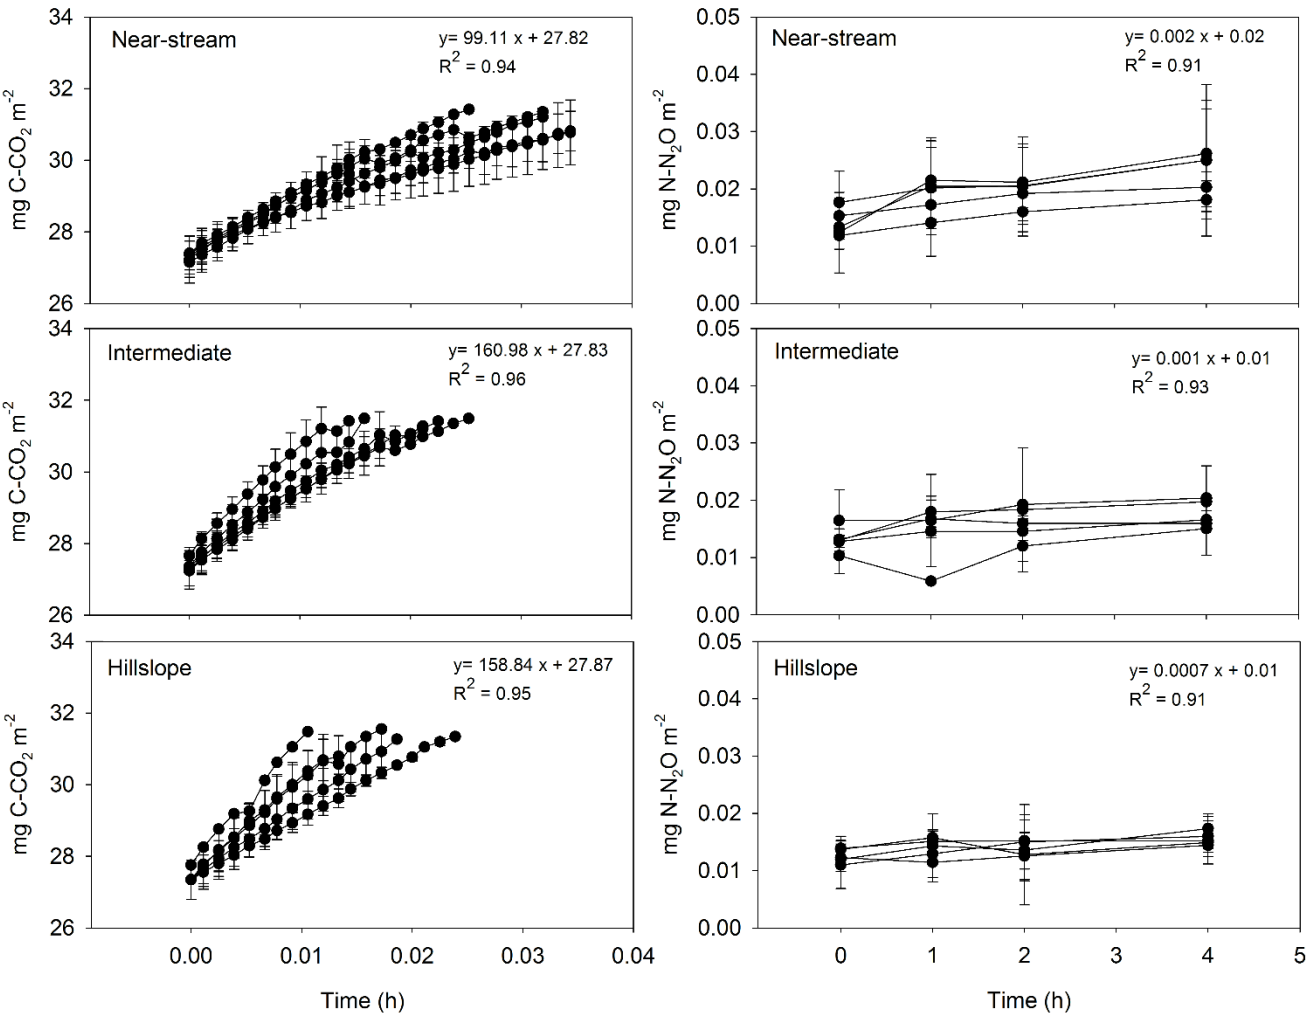

**Figure S2.** Loading plot of the (a) CO<sub>2</sub> and (b) N<sub>2</sub>O partial least squares models (PLS) for the 75 measurements. The graph depicts the correlation structures between the X variables (circles) and gas emissions (vectors). Variables situated along the same directional axis correlate with each other. Different color in X variables indicates their influence on gas emissions based on the “variable importance in the projection (VIP)” scores for each model. In each case, white has VIP scores < 0.8, grey has VIP scores < 1.0 and black has VIP scores > 1.0.

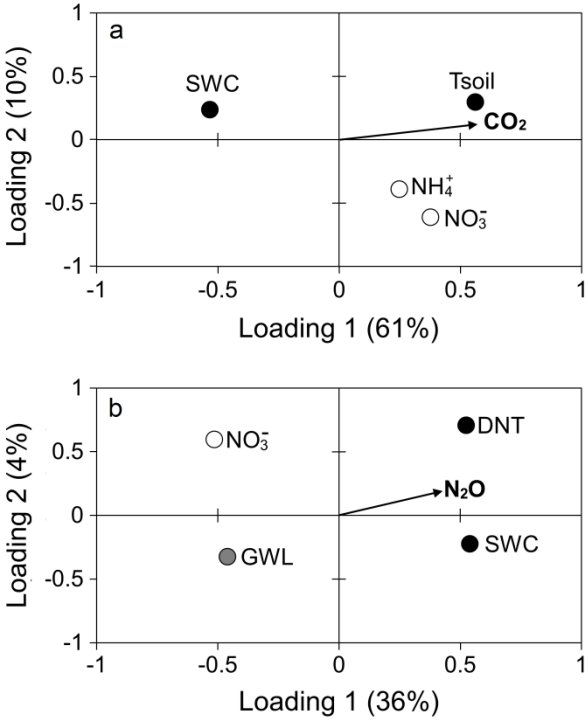

Supplement: Supplementary file 1 [file bg-14-4195-2017-supplement.pdf]
